# Supplementary material
Source: PubMed Central journal article supplement (PMC3271903)
Supplement: 1117220108_pnas.1117220108_SI.pdf [file 1117220108_pnas.1117220108_SI.pdf]

# Supporting Information

Moore et al. 10.1073/pnas.1117220108

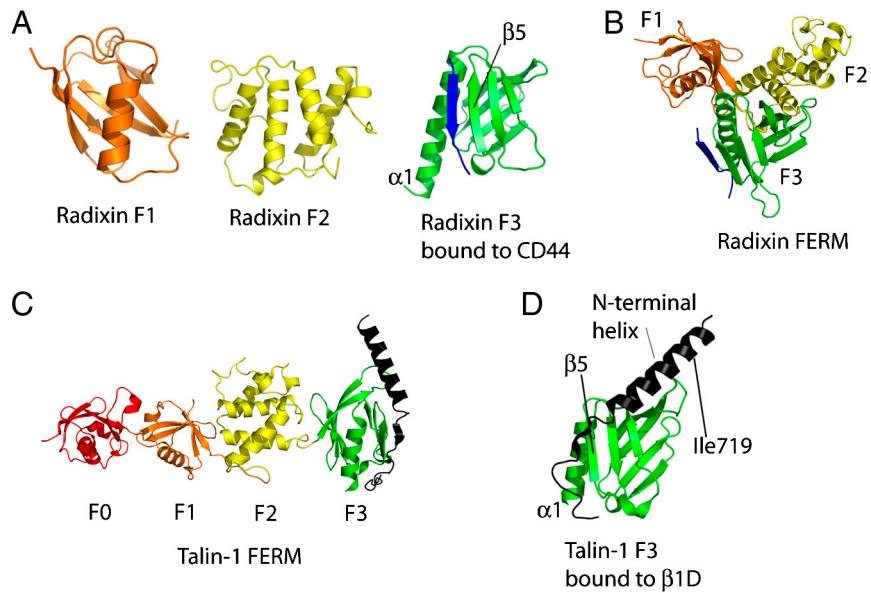

**Fig. S1.** Comparison of the talin-1 and radixin FERM domains. (A) The radixin FERM domain is composed of three subdomains: F1 (Left, orange), F2 (Center, yellow), and F3 (Right, green). The CD44 cytoplasmic tail (blue) binds to a cleft in F3 formed by helix  $\alpha 1$  and strand  $\beta 5$ . (B) The radixin subdomains adopt a canonical trefoil shape. (C) The talin-1 FERM domain contains F1 (orange), F2 (yellow), and F3 (green) domains, as well as an F0 subdomain (red) that precedes F1. Instead of a trefoil, the talin-1 FERM subdomains are arrayed linearly. (D) Model of talin-1 F3 (green) bound to the integrin  $\beta 1D$  CT (black). Two regions of the  $\beta 1D$  CT interact with talin-1 F3: Its C-terminal portion adopts an extended conformation and packs against a ridge formed by the interface of helix  $\alpha 1$  and strand  $\beta 5$  in F3, while an N-terminal  $\alpha$ -helix and a contiguous portion of the  $\beta 1$  transmembrane (TM) domain packs against the top of F3. Radixin structures were generated from Protein Data Bank (PDB) ID code 2ZPY. Talin-1 structures were modeled using PDB ID codes 3G9W and 3IVF.
